# Supplementary material for: Ganoderma lingzhi culture enhance growth performance via improvement of antioxidant activity and gut probiotic proliferation in Sanhuang broilers
Source: Front Vet Sci. 2023 Apr 17;10:1143649. doi: 10.3389/fvets.2023.1143649 (PMC10150954; doi:10.3389/fvets.2023.1143649)
Supplement: Supplementary file 1 [file Table_1.XLSX]

## Sheet: Sheet1
ID	Metabolite	Metab ID	Significant	Regulate	KEGG Compound ID	Mode	CAS ID	M/Z	Retention time	Adducts	Formula	Fragmentation Score	Theoretical Fragmentation Score	Library ID	KEGG Compound First Category	KEGG Compound Second Category	KEGG Pathway ID	KEGG Pathway First Category	KEGG Pathway Second Category	HMDB Superclass	HMDB Class	HMDB Subclass	Fragmentation Score	Theoretical Fragmentation Score	KEGG Pathway Description	KEGG Pathway Description	VIP_pred_OPLS-DA	VIP_PLS-DA	FC(CON/GLC2)	P_value	FDR
pos_7904	3-alpha,20-alpha-Dihydroxy-5-beta-pregnane 3-glucuronide	metab_7773	yes	up	-	pos	-	497.312	2.58128	M+H	C27H44O8	0	57.4	HMDB0010352	-	-	-	-	-	Lipids and lipid-like molecules	Steroids and steroid derivatives	Steroidal glycosides	0	57.4	-	-	4.4054	4.1827	1.6234	1.66e-12	4.34e-09
pos_7587	3-(3,4,5-Trimethoxyphenyl)propanoic acid	metab_7423	yes	up	-	pos	25173-72-2	258.134	2.9093	M+NH4	C12H16O5	0	39.1	HMDB0030254	-	-	-	-	-	Phenylpropanoids and polyketides	Phenylpropanoic acids	Not Available	0	39.1	-	-	2.0043	2.0655	1.1289	9.67e-05	0.009061
pos_5949	18R-hydroxy-5Z,8Z,11Z,14Z,16E-eicosapentaenoic acid	metab_5609	yes	up	C18177	pos	-	336.253	5.69763	M+NH4	C20H30O3	0	57.7	LMFA03070025;HMDB0062222	-	-	-	-	-	Lipids and lipid-like molecules	Fatty Acyls	Eicosanoids	0	57.7	-	-	1.9552	1.9445	1.1192	0.0009557	0.05202
pos_8911	(3S,5S)-3,5-Diaminohexanoate	metab_8891	yes	up	C01186	pos	17027-83-7	129.102	1.90855	M+H-H2O	C6H14N2O2	0	31.3	HMDB0012115	-	-	map01100;map00310	Metabolism;Metabolism	Global and overview maps;Amino acid metabolism	Organic acids and derivatives	Carboxylic acids and derivatives	Amino acids, peptides, and analogues	0	31.3	Metabolic pathways;Lysine degradation	Metabolic pathways;Lysine degradation	1.6388	1.3721	1.0951	0.003283	0.1042
pos_4083	Gln Ile Ile	metab_3547	yes	up	-	pos	-	373.245	4.08773	M+H	C17H32N4O5	85.7	0	-	-	-	-	-	-	-	-	-	85.7	0	-	-	2.2496	1.8941	1.1917	0.005087	0.1269
pos_3927	L-beta-aspartyl-L-aspartic acid	metab_3374	yes	down	-	pos	-	281.099	3.68242	M+CH3OH+H	C8H12N2O7	0	40	HMDB0011163	-	-	-	-	-	Organic acids and derivatives	Peptidomimetics	Hybrid peptides	0	40	-	-	4.0379	3.7277	0.6281	8.22e-11	1.1e-07
pos_2811	Nicotinamide riboside	metab_2138	yes	down	C03150	pos	1341-23-7	300.071	1.85415	M+2Na-H	C11H15N2O5+	0	47.1	HMDB0000855;PW_C000681	-	-	map01100;map04212;map00760	Metabolism;Organismal Systems;Metabolism	Global and overview maps;Aging;Metabolism of cofactors and vitamins	Organic oxygen compounds	Organooxygen compounds	Carbohydrates and carbohydrate conjugates	0	47.1	Metabolic pathways;Longevity regulating pathway - worm;Nicotinate and nicotinamide metabolism	Metabolic pathways;Longevity regulating pathway - worm;Nicotinate and nicotinamide metabolism	3.2142	2.9709	0.76	1.24e-09	8.32e-07
pos_8204	2-Amino-4-[(2-hydroxy-1-oxopropyl)amino]butanoic acid	metab_8107	yes	down	-	pos	38710-35-9	155.082	2.33842	M+H-2H2O	C7H14N2O4	0	33.5	HMDB0031412	-	-	-	-	-	Organic acids and derivatives	Carboxylic acids and derivatives	Amino acids, peptides, and analogues	0	33.5	-	-	3.772	3.4796	0.6578	3.79e-09	1.79e-06
pos_7096	3-carboxy-4-methyl-5-pentyl-2-furanpropanoic acid	metab_6878	yes	down	-	pos	-	286.165	3.50287	M+NH4	C14H20O5	0	49.5	LMFA01150047;HMDB0061643	-	-	-	-	-	Lipids and lipid-like molecules	Fatty Acyls	Fatty acids and conjugates	0	49.5	-	-	3.7042	3.365	0.6734	3.78e-09	1.79e-06
pos_3920	Methionyl-Proline	metab_3367	yes	down	-	pos	-	310.119	3.65112	M+ACN+Na	C10H18N2O3S	0	43.8	HMDB0028981	-	-	-	-	-	Organic acids and derivatives	Carboxylic acids and derivatives	Amino acids, peptides, and analogues	0	43.8	-	-	4.1954	3.7659	0.6064	5.49e-08	1.61e-05
pos_9038	L-N-(3-Carboxypropyl)glutamine	metab_9031	yes	down	-	pos	3183-72-0	215.103	1.79237	M+H-H2O	C9H16N2O5	0	45.2	HMDB0029393	-	-	-	-	-	Organic acids and derivatives	Carboxylic acids and derivatives	Amino acids, peptides, and analogues	0	45.2	-	-	3.0211	2.7229	0.8268	5.07e-08	1.57e-05
pos_1795	Pro Asp	metab_1011	yes	down	-	pos	-	231.098	2.16623	M+H, M+Na	C9H14N2O5	33.8	0	-	-	-	-	-	-	-	-	-	33.8	0	-	-	2.8557	2.6484	0.8124	1.51e-07	3.84e-05
pos_9340	(S)-Isowillardiine	metab_9365	yes	down	C08289	pos	21381-33-9	164.046	1.16045	M+H-2H2O	C7H9N3O4	0	70.3	HMDB0030376	-	-	-	-	-	Organic acids and derivatives	Carboxylic acids and derivatives	Amino acids, peptides, and analogues	0	70.3	-	-	2.6963	2.6134	0.8293	1.53e-07	3.84e-05
pos_9157	Hydroxyprolylhydroxyproline	metab_9162	yes	down	-	pos	21768-17-2	245.113	1.6217	M+H	C10H16N2O5	0	45.1	HMDB0028864	-	-	-	-	-	Organic acids and derivatives	Carboxylic acids and derivatives	Amino acids, peptides, and analogues	0	45.1	-	-	2.7807	2.7384	0.8605	1.65e-07	4.03e-05
pos_8809	Aspartyl-Leucine	metab_8777	yes	down	-	pos	-	229.119	1.94767	M+H-H2O	C10H18N2O5	0	32.9	HMDB0028757	-	-	-	-	-	Organic acids and derivatives	Carboxylic acids and derivatives	Amino acids, peptides, and analogues	0	32.9	-	-	2.1073	1.9307	0.9121	1.97e-07	4.67e-05
pos_3122	Epinephrine	metab_2484	yes	down	C00788	pos	51-43-4	184.097	2.22107	M+H	C9H13NO3	43.8	0	PW_C000048;HMDB0000068;MJDBOTE0000810	Hormones and transmitters;Hormones and transmitters	Other hormones;Neurotransmitters	map01100;map05207;map02024;map04261;map04923;map02020;map04024;map04080;map04924;map00350	Metabolism;Human Diseases;Cellular Processes;Organismal Systems;Organismal Systems;Environmental Information Processing;Environmental Information Processing;Environmental Information Processing;Organismal Systems;Metabolism	Global and overview maps;Cancer: overview;Cellular community - prokaryotes;Circulatory system;Endocrine system;Signal transduction;Signal transduction;Signaling molecules and interaction;Endocrine system;Amino acid metabolism	Benzenoids	Phenols	Benzenediols	43.8	0	Metabolic pathways;Chemical carcinogenesis - receptor activation;Quorum sensing;Adrenergic signaling in cardiomyocytes;Regulation of lipolysis in adipocytes;Two-component system;cAMP signaling pathway;Neuroactive ligand-receptor interaction;Renin secretion;Tyrosine metabolism	Metabolic pathways;Chemical carcinogenesis - receptor activation;Quorum sensing;Adrenergic signaling in cardiomyocytes;Regulation of lipolysis in adipocytes;Two-component system;cAMP signaling pathway;Neuroactive ligand-receptor interaction;Renin secretion;Tyrosine metabolism	1.1663	1.0609	0.9699	3.612e-07	8.314e-05
pos_9471	Topaquinone	metab_9508	yes	down	-	pos	64192-68-3	212.056	0.942067	M+H	C9H9NO5	0	51.6	PW_C007226;HMDB0011639	-	-	-	-	-	Organic acids and derivatives	Carboxylic acids and derivatives	Amino acids, peptides, and analogues	0	51.6	-	-	3.7276	3.5283	0.6811	2.22e-06	0.000387
pos_7378	Indolylacryloylglycine	metab_7191	yes	down	-	pos	3475-68-1	227.082	3.15148	M+H-H2O	C13H12N2O3	0	45.6	HMDB0006005	-	-	-	-	-	Organic acids and derivatives	Carboxylic acids and derivatives	Amino acids, peptides, and analogues	0	45.6	-	-	2.8515	2.5463	0.7903	1.26e-06	0.0002355
pos_3857	2',3'-Dideoxy-3'-fluorouridine	metab_3296	yes	down	-	pos	-	213.066	3.49503	M+H-H2O	C9H11FN2O4	0	75.9	HMDB0245543	-	-	-	-	-	Nucleosides, nucleotides, and analogues	Pyrimidine nucleosides	Pyrimidine 2'',3''-dideoxyribonucleosides	0	75.9	-	-	2.0815	2.0027	0.9059	1.01e-06	0.0002038
pos_9811	(2S,2'S)-Pyrosaccharopine	metab_9885	yes	down	-	pos	38495-84-0	259.129	0.631083	M+H	C11H18N2O5	0	59.6	HMDB0038676	-	-	-	-	-	Organic acids and derivatives	Carboxylic acids and derivatives	Amino acids, peptides, and analogues	0	59.6	-	-	4.8517	4.4434	0.5055	1.28e-05	0.001674
pos_7346	8-Azaadenosine	metab_7156	yes	down	C11265	pos	10299-44-2	269.1	3.1906	M+H	C9H12N6O4	57.6	0	-	-	-	-	-	-	-	-	-	57.6	0	-	-	4.3624	3.7433	0.5222	8.98e-05	0.008512
pos_176	Serylproline	metab_972	yes	down	-	pos	23827-93-2	185.092	2.1584	M+Na, M+ACN+H, M+H-H2O	C8H14N2O4	0	35.8	HMDB0029047	-	-	-	-	-	Organic acids and derivatives	Carboxylic acids and derivatives	Amino acids, peptides, and analogues	0	35.8	-	-	2.5452	2.3087	0.8459	5.63e-06	0.0008892
pos_9781	Menthone 1,2-glyceryl ketal	metab_9851	yes	down	-	pos	63187-91-7	273.145	0.6461	M+2Na-H	C13H24O3	0	56	HMDB0036139	-	-	-	-	-	Lipids and lipid-like molecules	Prenol lipids	Monoterpenoids	0	56	-	-	2.7578	2.5625	0.8449	1.1e-05	0.00155
pos_9258	Aspartyl-Valine	metab_9273	yes	down	-	pos	-	215.103	1.30122	M+H-H2O	C9H16N2O5	0	43.2	HMDB0028766	-	-	-	-	-	Organic acids and derivatives	Carboxylic acids and derivatives	Amino acids, peptides, and analogues	0	43.2	-	-	2.1761	1.8714	0.8989	1.05e-05	0.001517
pos_9635	Pyridoxine	metab_9689	yes	down	C00314	pos	58-56-0;65-23-6	170.081	0.699667	M+H	C8H11NO3	54.3	0	HMDB0301760;PW_C000161;HMDB0000239;MJDBOTE0000424	Vitamins and cofactors	Vitamins	map01100;map00750;map01120;map01240	Metabolism;Metabolism;Metabolism;Metabolism	Global and overview maps;Metabolism of cofactors and vitamins;Global and overview maps;Global and overview maps	Organoheterocyclic compounds	Pyridines and derivatives	Pyridoxines	54.3	0	Metabolic pathways;Vitamin B6 metabolism;Microbial metabolism in diverse environments;Biosynthesis of cofactors	Metabolic pathways;Vitamin B6 metabolism;Microbial metabolism in diverse environments;Biosynthesis of cofactors	1.8888	1.7167	0.9265	9.786e-06	0.001433
pos_9451	Oxypinnatanine	metab_9486	yes	down	-	pos	52329-55-2	225.087	0.988967	M+H-2H2O	C10H16N2O6	0	49.1	HMDB0029403	-	-	-	-	-	Organic acids and derivatives	Carboxylic acids and derivatives	Amino acids, peptides, and analogues	0	49.1	-	-	2.9797	2.702	0.773	1.69e-05	0.002162
pos_9826	2',3'-Didehydro-2',3'-dideoxyguanosine	metab_9901	yes	down	-	pos	-	282.118	0.623433	M+CH3OH+H	C10H11N5O3	0	41.1	HMDB0245542	-	-	-	-	-	Organoheterocyclic compounds	Imidazopyrimidines	Purines and purine derivatives	0	41.1	-	-	3.1141	2.8948	0.7857	3.73e-05	0.004289
pos_8242	3 Hydroxycoumarin	metab_8149	yes	down	-	pos	939-19-5	204.066	2.30713	M+ACN+H	C9H6O3	0	62.9	HMDB0002149	-	-	-	-	-	Phenylpropanoids and polyketides	Coumarins and derivatives	Hydroxycoumarins	0	62.9	-	-	3.0346	2.8948	0.7628	5.56e-05	0.005669
pos_4103	8-Deoxy-11-hydroxy-13-chlorogrosheimin	metab_3570	yes	down	-	pos	83551-02-4	281.092	4.1345	M+H-H2O	C15H19ClO4	0	53.6	HMDB0041037	-	-	-	-	-	Lipids and lipid-like molecules	Prenol lipids	Terpene lactones	0	53.6	-	-	3.077	2.7244	0.731	0.0001989	0.01571
pos_736	1-Methylpseudouridine	metab_7171	yes	down	-	pos	-	241.082	2.3306	M+H-H2O, M+H	C10H14N2O6	39.9	0	-	-	-	-	-	-	-	-	-	39.9	0	-	-	2.5441	2.1937	0.8299	0.0001397	0.01199
pos_7561	Gravacridonediol	metab_7395	yes	down	-	pos	37551-75-0	364.114	2.93307	M+Na	C19H19NO5	0	60.6	HMDB0029326	-	-	-	-	-	Organoheterocyclic compounds	Quinolines and derivatives	Benzoquinolines	0	60.6	-	-	3.3854	2.8666	0.6945	0.0008484	0.04813
pos_5535	Ricinoleic acid	metab_5153	yes	down	C08365	pos	141-22-0	281.248	6.08895	M+H-H2O	C18H34O3	0	68.8	LMFA02000184;HMDB0034297	-	-	-	-	-	Lipids and lipid-like molecules	Fatty Acyls	Fatty acids and conjugates	0	68.8	-	-	3.549	4.0746	0.6337	0.002267	0.08661
pos_4812	MG(16:0/0:0/0:0)	metab_4355	yes	down	-	pos	32899-41-5	295.263	6.11703	M+H-2H2O	C19H38O4	0	65.4	HMDB0011564;LMGL01010009	-	-	-	-	-	Lipids and lipid-like molecules	Glycerolipids	Monoradylglycerols	0	65.4	-	-	3.0614	3.5776	0.6865	0.003904	0.1133
pos_6013	Vamonolide	metab_5682	yes	down	-	pos	114332-66-0	455.276	5.6274	M+H-H2O	C28H40O6	0	35.3	HMDB0037379	-	-	-	-	-	Lipids and lipid-like molecules	Steroids and steroid derivatives	Steroid lactones	0	35.3	-	-	3.1748	2.63	0.7168	0.009427	0.1754
pos_9650	4-Hydroxypyridine	metab_9706	yes	down	-	pos	-	96.0449	0.699667	M+H	C5H5NO	46.9	0	-	-	-	-	-	-	-	-	-	46.9	0	-	-	1.3497	1.1658	0.9591	2.905e-05	0.003493
pos_3114	1-(4-chlorophenyl)-2-(4-pyrimidin-2-ylpiperazin-1-yl)ethanol	metab_2475	yes	down	-	pos	-	319.129	2.20543	M+H	C16H19ClN4O	67	0	-	-	-	-	-	-	-	-	-	67	0	-	-	1.9722	1.6947	0.9086	3.647e-05	0.004257
pos_7202	Liquiritigenin	metab_6997	yes	down	C09762	pos	578-86-9	274.108	3.36235	M+NH4	C15H12O4	0	39.7	LMPK12140061;HMDB0029519;MJDBOTE0001096	-	-	map00943;map01100;map00941;map01110;map01061	Metabolism;Metabolism;Metabolism;Metabolism;Metabolism	Biosynthesis of other secondary metabolites;Global and overview maps;Biosynthesis of other secondary metabolites;Global and overview maps;Chemical structure transformation maps	Phenylpropanoids and polyketides	Flavonoids	Flavans	0	39.7	Isoflavonoid biosynthesis;Metabolic pathways;Flavonoid biosynthesis;Biosynthesis of secondary metabolites;Biosynthesis of phenylpropanoids	Isoflavonoid biosynthesis;Metabolic pathways;Flavonoid biosynthesis;Biosynthesis of secondary metabolites;Biosynthesis of phenylpropanoids	2.0677	1.7752	0.8991	5.1e-05	0.005404
pos_3511	Phenylalanylthreonine	metab_2914	yes	down	-	pos	51352-44-4	249.124	2.83115	M+H-H2O	C13H18N2O4	0	60.1	HMDB0029005	-	-	-	-	-	Organic acids and derivatives	Carboxylic acids and derivatives	Amino acids, peptides, and analogues	0	60.1	-	-	1.7356	1.4778	0.9293	7.002e-05	0.006902
pos_736	1-Methylpseudouridine	metab_7171	yes	down	-	pos	-	241.082	2.3306	M+H-H2O, M+H	C10H14N2O6	39.9	0	-	-	-	-	-	-	-	-	-	39.9	0	-	-	2.5441	2.1937	0.8299	0.0001397	0.01199
pos_9092	Threoninyl-Gamma-glutamate	metab_9091	yes	down	-	pos	-	230.114	1.6999	M+H-H2O	C9H17N3O5	0	52.6	HMDB0029075	-	-	-	-	-	Organic acids and derivatives	Carboxylic acids and derivatives	Amino acids, peptides, and analogues	0	52.6	-	-	1.9664	1.6702	0.9175	0.0001369	0.01199
pos_3740	Malonylcarnitine	metab_3168	yes	down	-	pos	910825-21-7	212.092	3.26088	M+H-2H2O	C10H17NO6	0	55.7	LMFA07070080;LMFA07070093;HMDB0002095	-	-	-	-	-	Lipids and lipid-like molecules	Fatty Acyls	Fatty acid esters	0	55.7	-	-	2.0635	1.7614	0.8906	0.0002033	0.0159
pos_9125	5-Methyldeoxycytidine	metab_9127	yes	down	C03592	pos	838-07-3	274.14	1.66862	M+CH3OH+H	C10H15N3O4	0	34.7	HMDB0002224	-	-	-	-	-	Nucleosides, nucleotides, and analogues	Pyrimidine nucleosides	Pyrimidine 2''-deoxyribonucleosides	0	34.7	-	-	1.9188	1.6801	0.9123	0.0001909	0.01522
pos_3689	Cotinine glucuronide	metab_3110	yes	down	C00190	pos	139427-57-9	317.113	3.15148	M+H-2H2O	C16H20N2O7	0	78.1	PW_C000801;HMDB0001013	-	-	map01100;map00520;map00908	Metabolism;Metabolism;Metabolism	Global and overview maps;Carbohydrate metabolism;Metabolism of terpenoids and polyketides	Nucleosides, nucleotides, and analogues	Pyrimidine nucleotides	Pyrimidine ribonucleotides	0	78.1	Metabolic pathways;Amino sugar and nucleotide sugar metabolism;Zeatin biosynthesis	Metabolic pathways;Amino sugar and nucleotide sugar metabolism;Zeatin biosynthesis	2.2259	1.9676	0.8591	0.0002592	0.0197
pos_9138	N-Ribosylhistidine	metab_9141	yes	down	-	pos	98379-91-0	288.119	1.65295	M+H	C11H17N3O6	0	70.8	HMDB0002089	-	-	-	-	-	Organic acids and derivatives	Carboxylic acids and derivatives	Amino acids, peptides, and analogues	0	70.8	-	-	2.3231	1.9832	0.8784	0.0003257	0.02407
pos_7263	3-Hydroxyisovalerylcarnitine	metab_7064	yes	down	-	pos	99159-87-2	262.165	3.29187	M+H	C12H23NO5	0	30.9	HMDB0061189;LMFA07070041	-	-	-	-	-	Lipids and lipid-like molecules	Fatty Acyls	Fatty acid esters	0	30.9	-	-	1.6734	1.4218	0.9305	0.0004315	0.03055
pos_9138	N-Ribosylhistidine	metab_9141	yes	down	-	pos	98379-91-0	288.119	1.65295	M+H	C11H17N3O6	0	70.8	HMDB0002089	-	-	-	-	-	Organic acids and derivatives	Carboxylic acids and derivatives	Amino acids, peptides, and analogues	0	70.8	-	-	2.3231	1.9832	0.8784	0.0003257	0.02407
pos_3184	Gamma-Glutaminyl-4-hydroxybenzene	metab_2552	yes	down	-	pos	30382-24-2	256.13	2.32278	M+NH4	C11H14N2O4	0	34.2	HMDB0029451	-	-	-	-	-	Organic acids and derivatives	Carboxylic acids and derivatives	Amino acids, peptides, and analogues	0	34.2	-	-	2.7552	2.2801	0.7822	0.0008267	0.04723
pos_7052	1,2,3,4-Tetrahydro-b-carboline-1,3-dicarboxylic acid	metab_6830	yes	down	-	pos	59132-30-8	243.077	3.58087	M+H-H2O	C13H12N2O4	0	48.5	HMDB0032102	-	-	-	-	-	Alkaloids and derivatives	Harmala alkaloids	Not Available	0	48.5	-	-	2.8476	2.4415	0.7655	0.0009804	0.053
pos_7472	5-(3',4'-Dihydroxyphenyl)-gamma-valerolactone	metab_7296	yes	down	-	pos	191666-22-5	250.107	3.04217	M+ACN+H	C11H12O4	0	35	HMDB0029185;HMDB0240472	-	-	-	-	-	Benzenoids	Phenols	Benzenediols	0	35	-	-	2.737	2.2908	0.7773	0.001608	0.07034
pos_9059	5,6-Dihydrouridine	metab_9054	yes	down	-	pos	5627-05-04	288.119	1.75375	M+ACN+H	C9H14N2O6	0	60.6	HMDB0000497	-	-	-	-	-	Organic oxygen compounds	Organooxygen compounds	Carbohydrates and carbohydrate conjugates	0	60.6	-	-	2.7118	2.2388	0.815	0.001195	0.05836
pos_1471	1,2,3-trimethylindole-5-carboxamide	metab_654	yes	down	-	pos	-	203.118	4.9747	M+H, M+Na	C12H14N2O	42.8	0	-	-	-	-	-	-	-	-	-	42.8	0	-	-	2.6915	2.5057	0.7659	0.005936	0.1386
